# Supplementary material
Source: PubMed Central journal article supplement (PMC6570561)
Supplement: NIHMS1014294-supplement-Supp_TableS1.pdf [file NIHMS1014294-supplement-Supp_TableS1.pdf]

Supplementary Table

Summary of literature review on the age-related changes in neurotypical children, adolescents, and adults

| Literature demonstrating that the ERN amplitude increased with age |                                                                                                                                                                                                                                                                     |                                              |                        |                      |                                                                                                                                                                                                        |
|--------------------------------------------------------------------|---------------------------------------------------------------------------------------------------------------------------------------------------------------------------------------------------------------------------------------------------------------------|----------------------------------------------|------------------------|----------------------|--------------------------------------------------------------------------------------------------------------------------------------------------------------------------------------------------------|
| Authors                                                            | Age group(s) and sample size                                                                                                                                                                                                                                        | Paradigm                                     | ERN measures           | Statistical analyses | Findings related to age effect                                                                                                                                                                         |
| Davies et al., 2004                                                | <ul style="list-style-type: none"> <li>individuals aged between 7-25 year-old (n=151)</li> </ul>                                                                                                                                                                    | Flanker task (H and S)                       | Peak-to-peak amplitude | Regression           | Age significantly accounts for significant variance in the ERN for boys (linear and quadratic trends) and girls (linear trend)                                                                         |
| DuPuis et al., 2014                                                | <ul style="list-style-type: none"> <li>Longitudinal study with 3 annual assessments</li> <li>children aged 5-7 year-old at initial assessment (n=234)</li> </ul>                                                                                                    | Go/No-Go                                     | Peak-to-peak amplitude | Multilevel modeling  | ERN amplitude increased in at a rate of 0.61 ( $p < .001$ ) units per year                                                                                                                             |
| Hajcak et al. 2008                                                 | <ul style="list-style-type: none"> <li>individuals aged 8-17 (n=18)</li> </ul>                                                                                                                                                                                      | A Modified Simon Task                        | Peak-to-peak amplitude | Correlation          | ERN increased with age                                                                                                                                                                                 |
| Hanna et al. 2012                                                  | <ul style="list-style-type: none"> <li>youth aged between 10-19 year-old (n=44)</li> </ul>                                                                                                                                                                          | Flanker task (arrow version)                 | Mean amplitude         | Correlation          | ERN at Cz increased with age                                                                                                                                                                           |
| Hogan et al., 2005                                                 | <ul style="list-style-type: none"> <li>adults: 18–22 yrs (n=11)</li> <li>adolescents: 12–18 yrs (n=12)</li> </ul>                                                                                                                                                   | Two forced-choice visual reaction time tasks | Peak-to-peak amplitude | ANOVA                | ERN amplitudes were larger for adults than adolescents for incompatible condition under the 4-choice task                                                                                              |
| Kim et al., 2007                                                   | <ul style="list-style-type: none"> <li>adults: 21–25 yrs (n=13)</li> <li>children: 7–11 yrs (n=9)                             <ul style="list-style-type: none"> <li>older children aged 9-11 (n=4)</li> <li>younger children aged 7-8 (n=5)</li> </ul> </li> </ul> | Go/No-Go                                     | Peak amplitude         | ANOVA                | <ul style="list-style-type: none"> <li>Peak amplitudes of 9–11-year-olds were larger than that of 7–8-year-olds</li> <li>Neither of the ERN amplitudes in child groups differed from adults</li> </ul> |
| Ladouceur et al., 2004                                             | <ul style="list-style-type: none"> <li>late adolescents: 14–17 yrs (n=6)</li> <li>early adolescents: 9–14 yrs (n=5)</li> </ul>                                                                                                                                      | Flanker task (arrow version)                 | Peak-to-peak amplitude | ANOVA                | ERN amplitudes were greater in the late adolescence group than the early adolescence group.                                                                                                            |
| Ladouceur et al., 2012                                             | <ul style="list-style-type: none"> <li>individuals aged 7-17 year-old (n=14)</li> </ul>                                                                                                                                                                             | Flanker task (arrow version)                 | Peak amplitude         | Correlation          | age was significantly negatively correlated with ERN                                                                                                                                                   |

| Meyer et al., 2012                                                       | <ul style="list-style-type: none"> <li>• children aged 8-13 year-old (n=55)</li> </ul>                                                                                     | Flanker task (arrow version)        | The average voltages in the 50ms around the peak of the ERN amplitude | Correlation          | Age is marginally correlated with ERN in older children (aged 11-13 year-old)                                                                                                                        |
|--------------------------------------------------------------------------|----------------------------------------------------------------------------------------------------------------------------------------------------------------------------|-------------------------------------|-----------------------------------------------------------------------|----------------------|------------------------------------------------------------------------------------------------------------------------------------------------------------------------------------------------------|
| Santesso et al., 2006                                                    | <ul style="list-style-type: none"> <li>• adults: 18–30 yrs (n=28)</li> <li>• children: 10 yrs (n=39)</li> </ul>                                                            | Flanker task (H and S)              | Peak-to-peak amplitude                                                | ANOVA                | Adult group had greater ERN amplitudes than children at Cz                                                                                                                                           |
| Santesso & Segalowitz, 2008                                              | <ul style="list-style-type: none"> <li>• older adolescents: 18–20 yrs (n=39)</li> <li>• younger adolescents: 15–16 yrs (n=35)</li> </ul>                                   | Flanker task (H and S) and Go/No-Go | Peak-to-peak amplitude                                                | ANOVA                | The ERN amplitudes in older adolescents (18–20 years old) was larger than younger adolescents (15–16 years old) on both go/no-go task and flanker task                                               |
| Torpey et al., 2012                                                      | <ul style="list-style-type: none"> <li>• children aged 5-6 year-old (n=328)</li> </ul>                                                                                     | Go/No-Go                            | $\Delta ERN_{Mean\_amplitude}$                                        | Regression           | <ul style="list-style-type: none"> <li>• <math>\Delta ERN</math> at Cz increased with age</li> </ul>                                                                                                 |
| Torpey et al., 2013                                                      | <ul style="list-style-type: none"> <li>• children aged 6 year-old (n=413)</li> </ul>                                                                                       | Go/No-Go                            | $\Delta ERN_{Mean\_amplitude}$                                        | Regression           | <ul style="list-style-type: none"> <li>• <math>\Delta ERN</math> at Cz increased with age</li> </ul>                                                                                                 |
| van Meel et al., 2012                                                    | <ul style="list-style-type: none"> <li>• young adults: 18–26 yrs (n=16)</li> <li>• older children: 10-12 yrs (n=24)</li> <li>• younger children: 6–9 yrs (n=23)</li> </ul> | Flanker task (arrow version)        | Mean amplitude                                                        | ANOVA                | <ul style="list-style-type: none"> <li>• ERN amplitudes were larger for adults than older children</li> <li>• No difference was found in ERN amplitude between younger and older children</li> </ul> |
| Wiersema, et al., 2007                                                   | <ul style="list-style-type: none"> <li>• adults: 23–24 yrs (n=17)</li> <li>• young adolescents: 13–14 yrs (n=14)</li> <li>• children: 7–8 yrs (n=13)</li> </ul>            | Go/No-Go                            | Peak amplitude                                                        | Correlation          | ERN amplitudes increased with age                                                                                                                                                                    |
| Literature demonstrating no age-related differences in the ERN amplitude |                                                                                                                                                                            |                                     |                                                                       |                      |                                                                                                                                                                                                      |
| Authors                                                                  | Age group(s) and sample size                                                                                                                                               | Paradigm                            | ERN measures                                                          | Statistical analyses | Findings                                                                                                                                                                                             |
| Brooker et al. 2011                                                      | <ul style="list-style-type: none"> <li>• children aged 4-8 year-old (n=33)</li> </ul>                                                                                      | Attention Network Test              | $\Delta ERN_{Peak\_amplitude}$                                        | Regression           | Age did not significantly predict $\Delta ERN$                                                                                                                                                       |
| Eppinger et al., 2009                                                    | <ul style="list-style-type: none"> <li>• adults (aged 19–24 yrs; n=18)</li> <li>• children (aged 10 - 12 yrs; n=17)</li> </ul>                                             | Two choice decision task            | Peak-to-peak amplitude                                                | ANOVA                | No differences in the ERN amplitudes between children and adults were found when                                                                                                                     |

|                          |                                                                                                                            |                                                 |                |            |                                                                  |
|--------------------------|----------------------------------------------------------------------------------------------------------------------------|-------------------------------------------------|----------------|------------|------------------------------------------------------------------|
|                          |                                                                                                                            |                                                 |                |            | performance differences are equated                              |
| Grammer et al., 2014     | <ul style="list-style-type: none"> <li>• children: 3–7 yrs (n=95)</li> </ul>                                               | Go/No-Go                                        | Mean amplitude | Regression | Age did not significantly account for the variance in ERN        |
| Richardson, et al., 2011 | <ul style="list-style-type: none"> <li>• older children: 9 yrs (n=41)</li> <li>• younger children: 7 yrs (n=36)</li> </ul> | Flanker task (fish version) with color reversal | Peak amplitude | ANOVA      | No main effect or interaction effect of age on the ERN amplitude |

Note:  $\Delta ERN_{Mean\_amplitude}$  = Difference between mean amplitude of the ERN and CRN;  $\Delta ERN_{Peak\_amplitude}$  = Difference between peak amplitude of ERN and CRN; ANOVA= Analysis of variance; MANOVA= multivariate analysis of variance

### References for Supplementary Table

- Brooker, R. J., Buss, K. A., & Dennis, T. A. (2011). Error-monitoring brain activity is associated with affective behaviors in young children. *Developmental Cognitive Neuroscience, 1*(2), 141–151. <https://doi.org/10.1016/j.dcn.2010.12.002>
- Davies, P. L., Segalowitz, S. J., & Gavin, W. J. (2004). Development of Response-Monitoring ERPs in Participants 7- to 25-Year Olds. *Developmental Neuropsychology, 25*, 355-376.
- DuPuis, D., Ram, N., Willner, C. J., Karalunas, S., Segalowitz, S. J., & Gatzke-Kopp, L. M. (2015). Implications of ongoing neural development for the measurement of the error-related negativity in childhood. *Developmental Science, 18*, 452-68. doi: 10.1111/desc.12229
- Eppinger, B., Mock, B., & Kray, J. (2009). Developmental differences in learning and error processing: evidence from ERPs. *Psychophysiology, 46*(5), 1043–1053. <https://doi.org/10.1111/j.1469-8986.2009.00838.x>
- Grammer, J. K., Carrasco, M., Gehring, W. J., & Morrison, F. J. (2014). Age-related changes in error processing in young children: A school-based investigation. *Developmental Cognitive Neuroscience, 9*, 93–105. <https://doi.org/10.1016/j.dcn.2014.02.001>
- Hajcak, G., Franklin, M. E., Foa, E. B., & Simons, R. F. (2008). Increased Error-Related Brain Activity in Pediatric Obsessive-Compulsive Disorder Before and After Treatment. *American Journal Of Psychiatry, 165*, 116-123. doi:10.1176/appi.ajp.2007.07010143
- Hanna, G. L., Carrasco, M., Harbin, S. M., Nienhuis, J. K., LaRosa, C. E., Chen, P., Fitzgerald, K. D., & Gehring, W. J. (2012). Error-related negativity and tic history in pediatric obsessive-compulsive disorder. *Journal Of The American Academy Of Child & Adolescent Psychiatry, 51*, 902-910. doi:10.1016/j.jaac.2012.06.019
- Hogan, A. M., Vargha-Khadem, F., Kirkham, F. J., & Baldeweg, T. (2005). Maturation of action monitoring from adolescence to adulthood: an ERP study. *Developmental Science, 8*, 525-534. doi:10.1111/j.1467-7687.2005.00444.x
- Kim, E. Y., Iwaki, N., Imashioya, H., Uno, H., & Fujita, T. (2007). Error-related negativity in a visual

- go/no-go task: children vs. adults. *Developmental Neuropsychology*, 31, 181-191. doi: 10.1080/87565640701190775
- Ladouceur, C. D., Dahl, R. E., & Carter, C. S. (2004). ERP correlates of action monitoring in adolescence. *Annals of the New York Academy of Sciences*, 1021, 329–336.  
<https://doi.org/10.1196/annals.1308.040>
- Ladouceur, C. D., Slifka, J. S., Dahl, R. E., Birmaher, B., Axelson, D. A., & Ryan, N. D. (2012). Altered error-related brain activity in youth with major depression. *Developmental Cognitive Neuroscience*, 2, 351-362. doi: <http://dx.doi.org/10.1016/j.dcn.2012.01.005>
- Meyer, A., Weinberg, A., Klein, D. N., & Hajcak, G. (2012). The development of the error-related negativity (ERN) and its relationship with anxiety: Evidence from 8 to 13 year-olds. *Developmental Cognitive Neuroscience*, 2(1), 152–161.  
<http://doi.org/10.1016/j.dcn.2011.09.005>
- Richardson, C., Anderson, M., Reid, C. L., & Fox, A. M. (2011). Neural Indicators of Error Processing and Intraindividual Variability in Reaction Time in 7 and 9 Year-Olds. *Developmental Psychobiology*, 53(3), 256–265. <https://doi.org/10.1002/dev.20518>
- Santesso, D. L., & Segalowitz, S. J. (2008). Developmental differences in error-related ERPs in middle- to late-adolescent males. *Developmental Psychology*, 44, 205-217. doi: 10.1037/0012-1649.44.1.205
- Santesso, D. L., Segalowitz, S. J., & Schmidt, L. A. (2006). Error-related electrocortical responses in 10-year-old children and young adults. *Developmental Science*, 9, 473-481. doi: 10.1111/j.1467-7687.2006.00514.x
- Torpey, D. C., Hajcak, G., Kim, J., Kujawa, A. J., Dyson, M. W., Olino, T. M., & Klein, D. N. (2013). Error-related brain activity in young children: associations with parental anxiety and child temperamental negative emotionality. *Journal of Child Psychology & Psychiatry*, 54(8), 854–862.  
<https://doi.org/10.1111/jcpp.12041>

Torpey, D. C., Hajcak, G., Kim, J., Kujawa, A., & Klein, D. N. (2012). Electro cortical and behavioral measures of response monitoring in young children during a Go/No-Go task. *Developmental Psychobiology*, *54*(2), 139–150. <https://doi.org/10.1002/dev.20590>

van Meel, C. S., Heslenfeld, D. J., Rommelse, N. N., Oosterlaan, J., & Sergeant, J. A. (2012). Developmental trajectories of neural mechanisms supporting conflict and error processing in middle childhood. *Developmental Neuropsychology*, *37*(4), 358–378. <https://doi.org/10.1080/87565641.2011.653062>

Wiersema, J. R., Meere, J. J., & Roeyers, H. (2007). Developmental changes in error monitoring: An event-related potential study. *Neuropsychologia*, *45*, 1649–1657. Retrieved from internal-pdf://53.8.114.26/1-s2.0-S0028393207000279-main.pdf
